# Supplementary material for: Agathis robusta Bark Extract Protects from Renal Ischemia-Reperfusion Injury: Phytochemical, In Silico and In Vivo Studies
Source: MDPI journal article supplement (doi:10.3390/ph15101270), 2022-10-14

**Figure S1:** The mass spectra of the identified metabolites in *Agathis robusta* bark extract by LC-ESI-MS/MS (negative and positive mode ESI).

### Quinic acid (1)

Spectrum from IDA-NEG-220228-SM0165.wiff (sample ...xperiment 2, -TOF MS<sup>2</sup> (50 - 1000) from 1.065 min  
Precursor: 191.1 Da

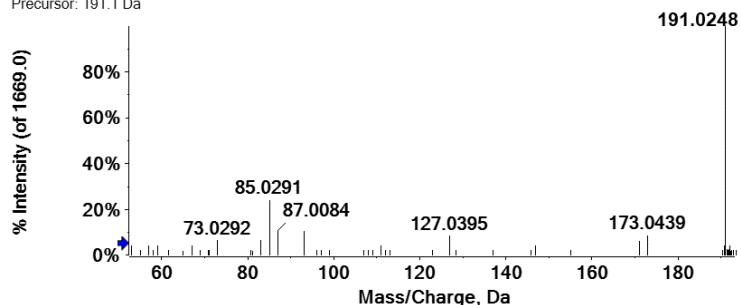

### Trihydroxy benzoic acid (gallic acid) (2)

Spectrum from IDA-NEG-220228-SM0165.wiff (sample ...xperiment 2, -TOF MS<sup>2</sup> (50 - 1000) from 1.117 min  
Precursor: 169.0 Da

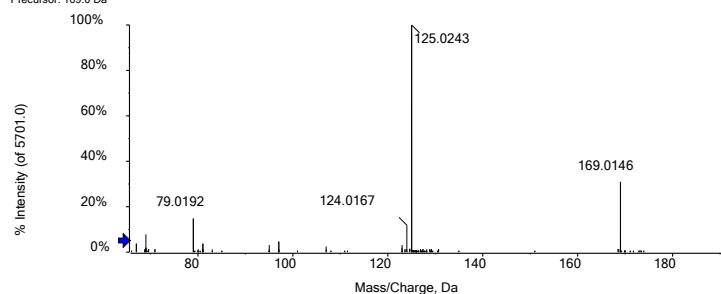

### Succinic acid (3)

Spectrum from IDA-NEG-220228-SM0165.wiff (sample ...xperiment 3, -TOF MS<sup>2</sup> (50 - 1000) from 1.143 min  
Precursor: 117.0 Da

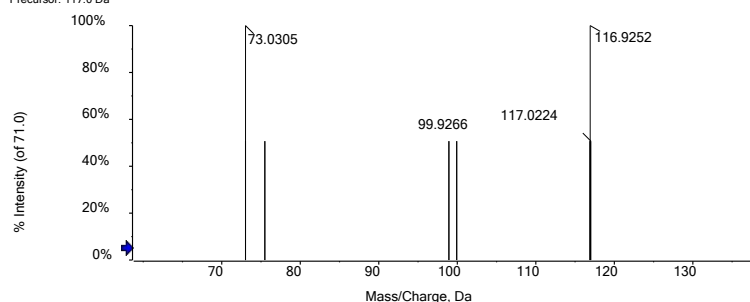

### Dihydroxybenzoic acid (protocatechuic acid) (4)

Spectrum from IDA-NEG-220228-SM0165.wiff (sample ...xperiment 4, -TOF MS<sup>2</sup> (50 - 1000) from 1.144 min  
Precursor: 153.0 Da

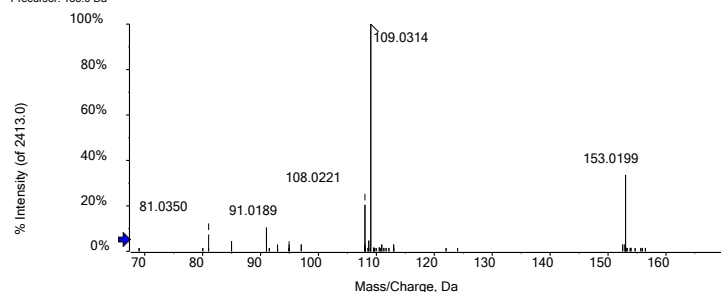

### Dihydrocaffeic acid [3-(3,4-Dihydroxy-phenyl)propionic acid] (5)

Spectrum from IDA-NEG-220228-SM0165.wiff (sample ...xperiment 6, -TOF MS<sup>2</sup> (50 - 1000) from 1.145 min  
Precursor: 181.0 Da

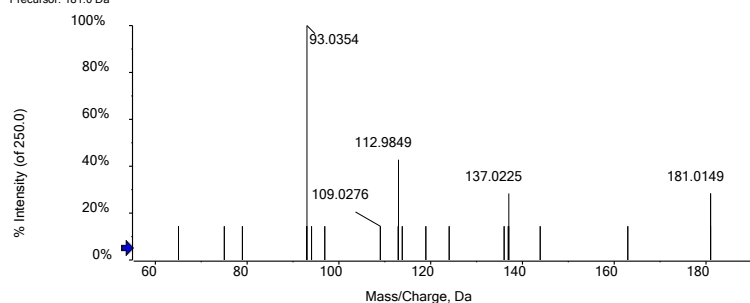

### β,3,4-Trihydroxy benzenepropanoic acid\* (6)

Spectrum from IDA-NEG-220228-SM0165.wiff (sample ...xperiment 7, -TOF MS<sup>2</sup> (50 - 1000) from 1.145 min  
Precursor: 197.0 Da

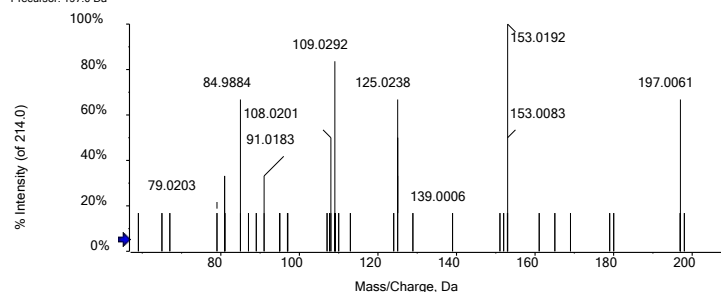

### N-methyl alanine (7)

Spectrum from IDA-POS-220224-SM0165.wiff (sample ...xperiment 2, +TOF MS<sup>2</sup> (50 - 1000) from 1.147 min  
Precursor: 104.1 Da, CE: 35.0

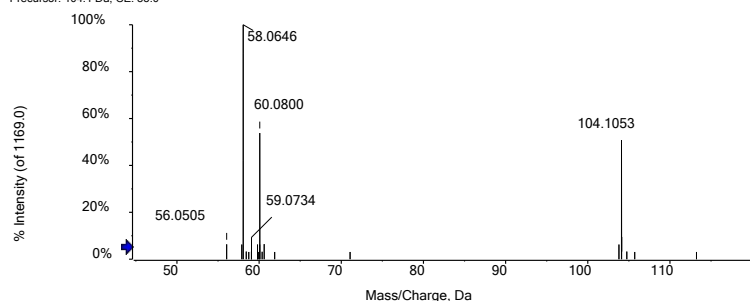

### 1,2-Benzenediol (8)

Spectrum from IDA-NEG-220228-SM0165.wiff (sample ...xperiment 2, -TOF MS<sup>2</sup> (50 - 1000) from 1.169 min  
Precursor: 109.0 Da

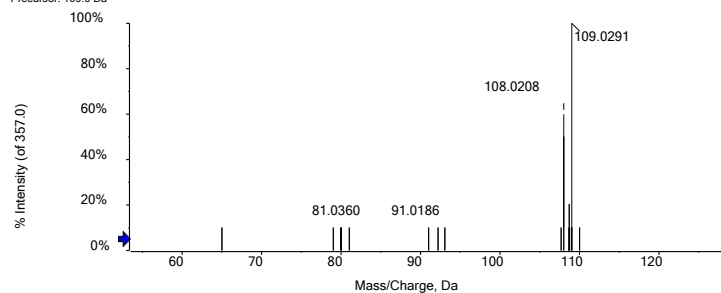

## Choline (9)

Spectrum from IDA-POS-220224-SM0165.wiff (sample ...xperiment 2, +TOF MS<sup>2</sup> (50 - 1000) from 1.173 min  
Precursor: 104.1 Da, CE: 35.0

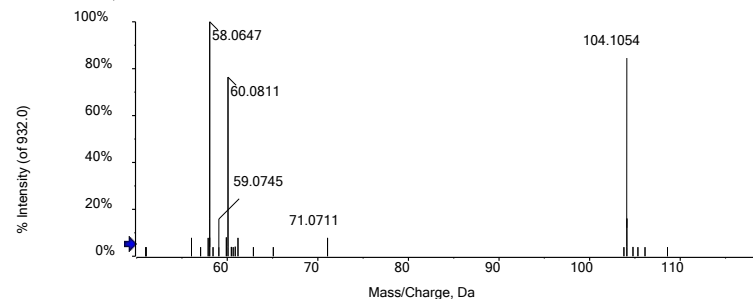

## Salicylic acid (10)

Spectrum from IDA-NEG-220228-SM0165.wiff (sample ...xperiment 3, -TOF MS<sup>2</sup> (50 - 1000) from 1.182 min  
Precursor: 137.0 Da

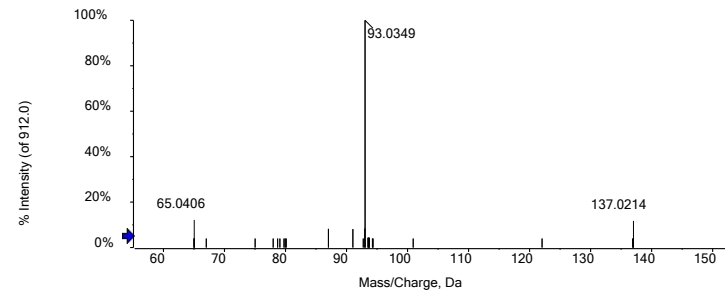

## Sorbitol 6-phosphate (11)

Spectrum from IDA-NEG-220228-SM0165.wiff (sample ...xperiment 9, -TOF MS<sup>2</sup> (50 - 1000) from 1.185 min  
Precursor: 261.0 Da

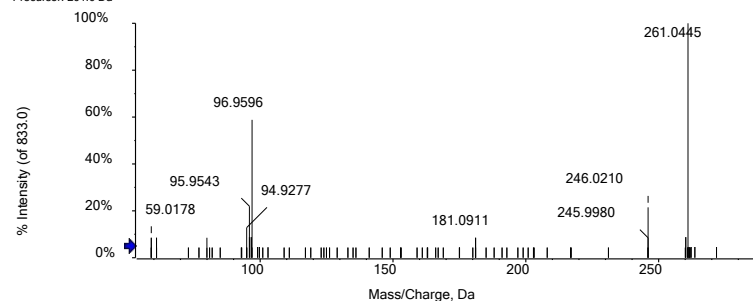

## 4- Aminophenol (12)

Spectrum from IDA-POS-220224-SM0165.wiff (sample ...xperiment 2, +TOF MS<sup>2</sup> (50 - 1000) from 1.186 min  
Precursor: 110.1 Da, CE: 35.0

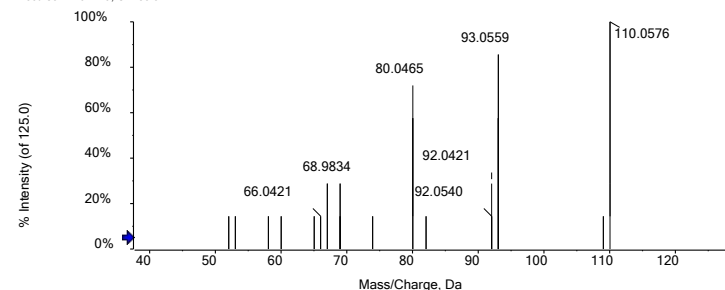

## Adenine (13)

Spectrum from IDA-POS-220224-SM0165.wiff (sample ...xperiment 2, +TOF MS<sup>2</sup> (50 - 1000) from 1.211 min  
Precursor: 136.1 Da, CE: 35.0

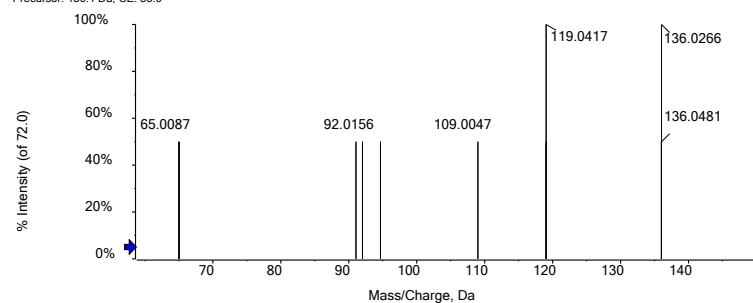

## Protocatechuic acid 4- glucoside (14)

Spectrum from IDA-NEG-220228-SM0165.wiff (sample ...xperiment 12, -TOF MS<sup>2</sup> (50 - 1000) from 1.237 min  
Precursor: 315.1 Da

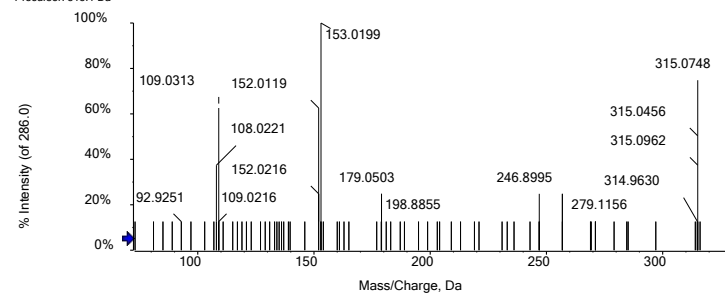

## Shikimic acid (15)

Spectrum from IDA-NEG-220228-SM0165.wiff (sample ...xperiment 2, -TOF MS<sup>2</sup> (50 - 1000) from 1.246 min  
Precursor: 173.1 Da

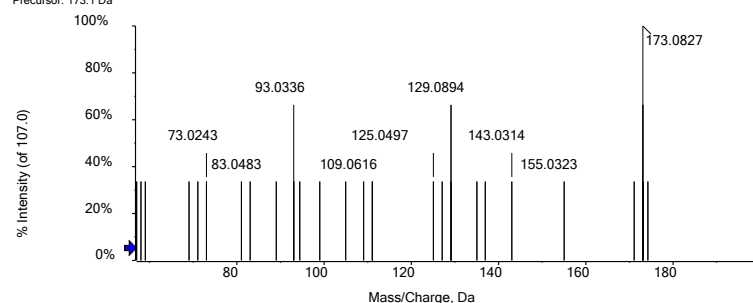

## Methoxy hydroxy benzoic acid (Vanillic acid) (16)

Spectrum from IDA-NEG-220228-SM0165.wiff (sample ...xperiment 2, -TOF MS<sup>2</sup> (50 - 1000) from 1.349 min  
Precursor: 167.0 Da

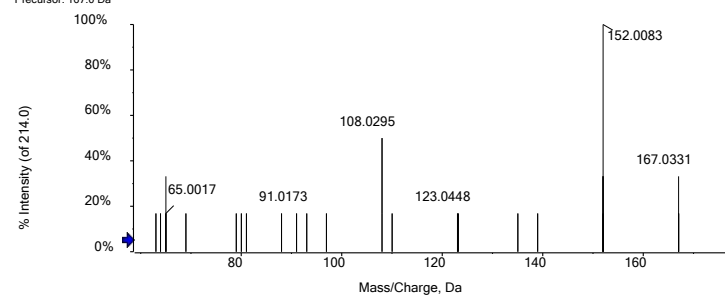

## *N,N,N*-trimethyl-L-alanyl-L-proline betaine (17)

Spectrum from IDA-POS-220224-SM0165.wiff (sample ...xperiment 3, +TOF MS<sup>2</sup> (50 - 1000) from 1.351 min  
Precursor: 229.2 Da, CE: 35.0

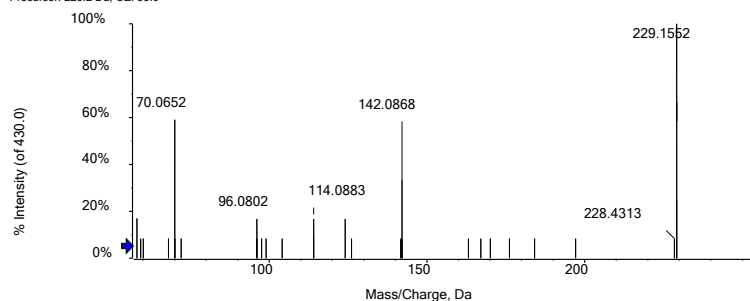

## Caffeic acid (18)

Spectrum from IDA-NEG-220228-SM0165.wiff (sample ...xperiment 2, -TOF MS<sup>2</sup> (50 - 1000) from 1.380 min  
Precursor: 179.1 Da

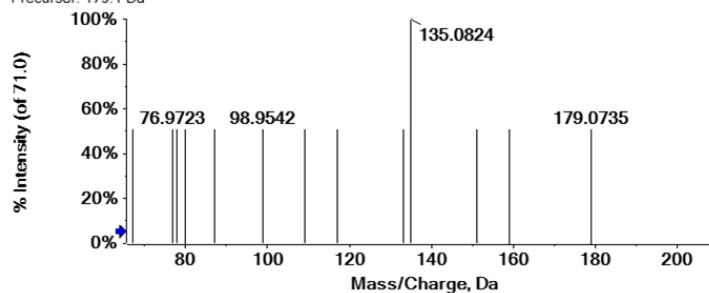

## Ferulic acid (19)

Spectrum from IDA-NEG-220228-SM0165.wiff (sample ...xperiment 4, -TOF MS<sup>2</sup> (50 - 1000) from 1.401 min  
Precursor: 193.1 Da

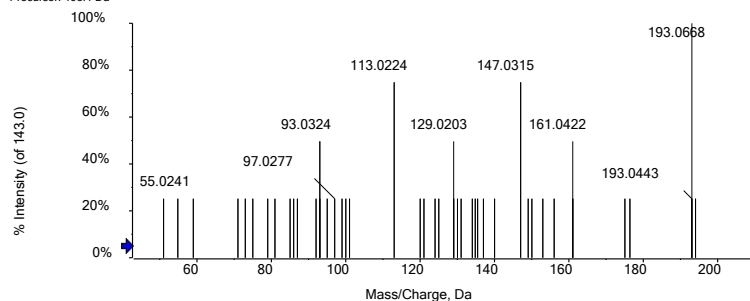

## Dihydrosinapic acid (20)

Spectrum from IDA-NEG-220228-SM0165.wiff (sample ...xperiment 8, -TOF MS<sup>2</sup> (50 - 1000) from 1.501 min  
Precursor: 225.0 Da

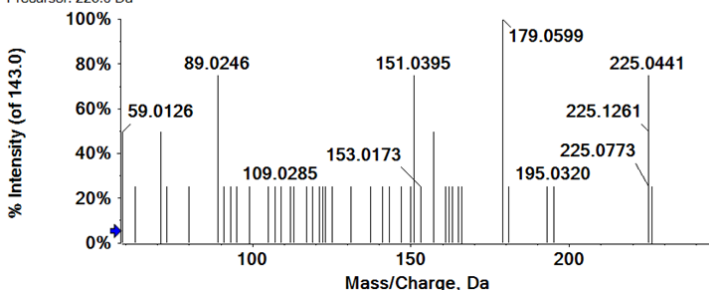

## 6-Hydroxycoumarin (21)

Spectrum from IDA-NEG-220228-SM0165.wiff (sample ...xperiment 5, -TOF MS<sup>2</sup> (50 - 1000) from 1.658 min  
Precursor: 161.0 Da

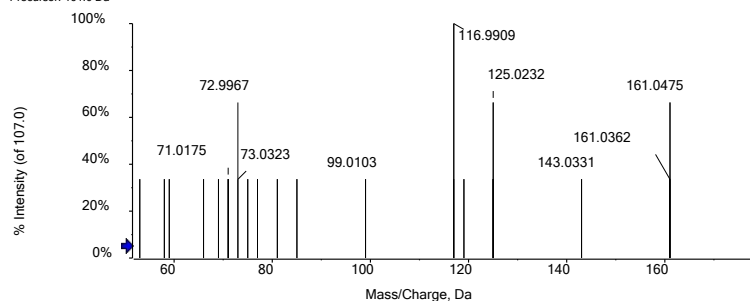

## Glycine- betaine (22)

Spectrum from IDA-POS-220224-SM0165.wiff (sample ...xperiment 2, +TOF MS<sup>2</sup> (50 - 1000) from 2.212 min  
Precursor: 118.1 Da, CE: 35.0

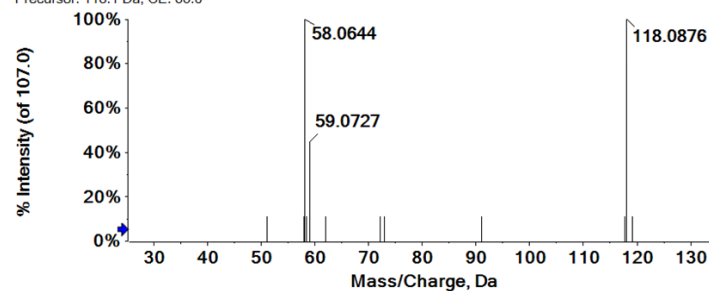

## [(epi)gallocatechin-(epi)gallocatechin] (23)

Spectrum from IDA-NEG-220228-SM0165.wiff (sample ...xperiment 2, -TOF MS<sup>2</sup> (50 - 1000) from 2.232 min  
Precursor: 609.1 Da

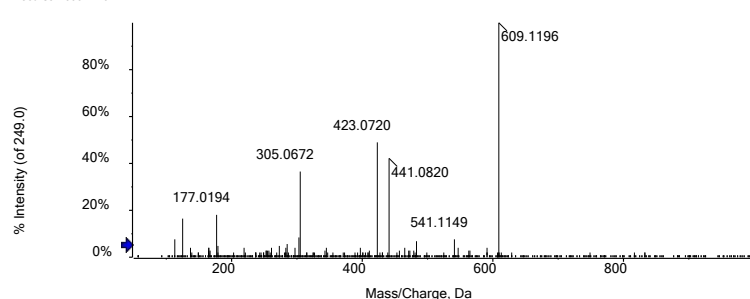

## [(epi)catechin-(epi)gallocatechin] (24)

Spectrum from IDA-NEG-220228-SM0165.wiff (sample ...xperiment 5, -TOF MS<sup>2</sup> (50 - 1000) from 3.618 min  
Precursor: 593.2 Da

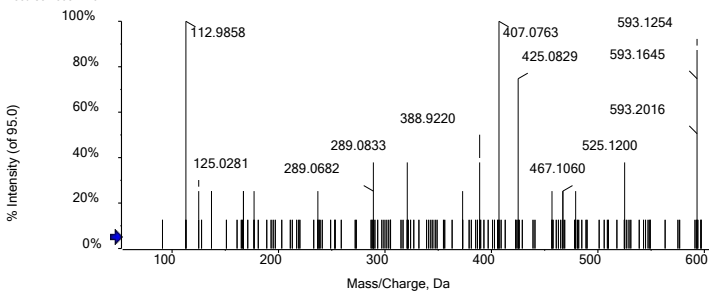

### [(epi)catechin-(epi)gallocatechin] (25)

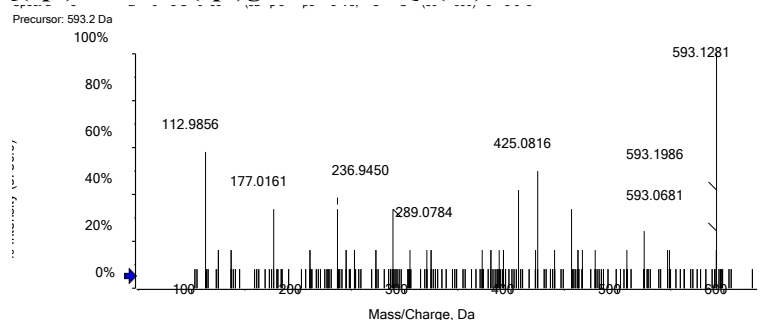

### [(epi)catechin-(epi)gallocatechin] (26)

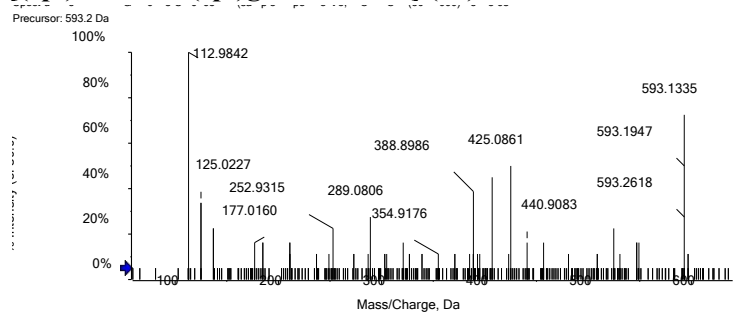

### [(epi)gallocatechin-(epi)gallocatechin] (27)

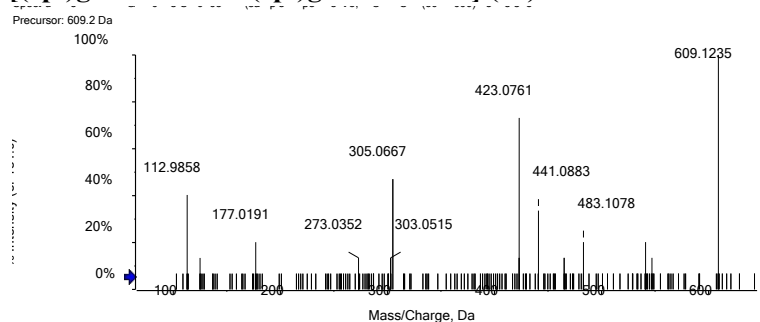

### (epi)gallocatechin (28)

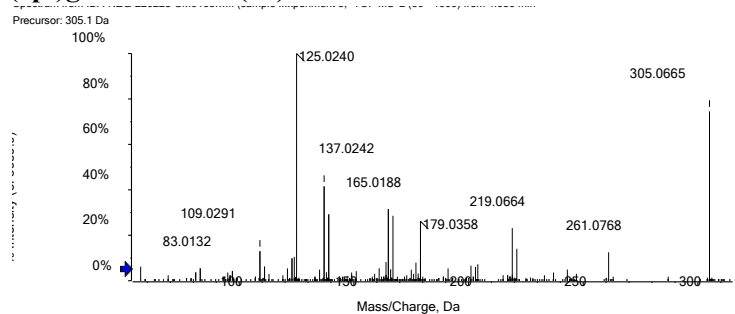

### [(epi)gallocatechin-(epi)gallocatechin]

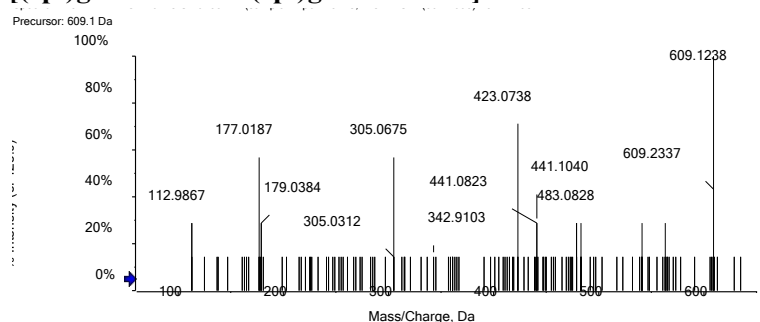

### Cysteine (30)

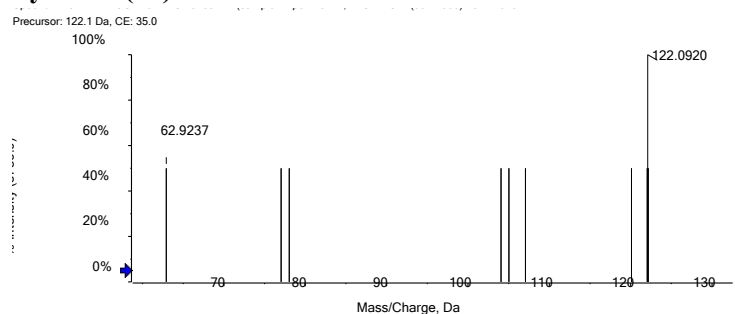

### Hydroxycaffeic acid\* (31)

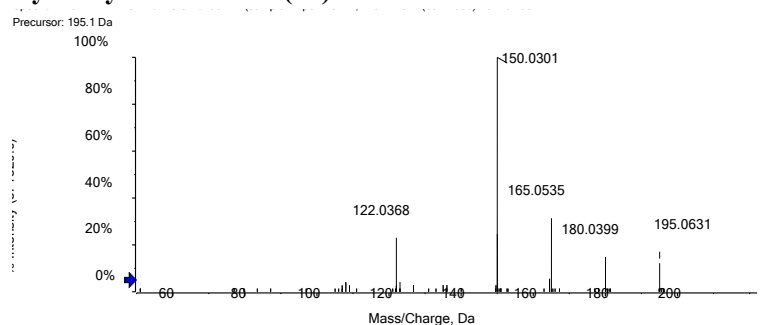

### Isorhamnetin-O-glucoside (32)

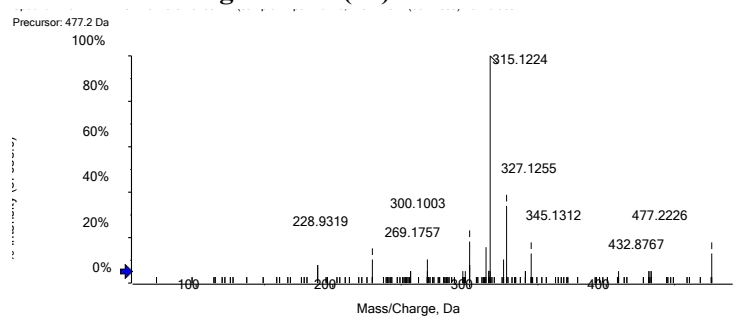

## Hypoxanthine (33)

Spectrum from IDA-POS-220224-SM0165.wiff (sample ...xperiment 2, +TOF MS<sup>2</sup> (50 - 1000) from 5.629 min  
Precursor: 137.1 Da, CE: 35.0

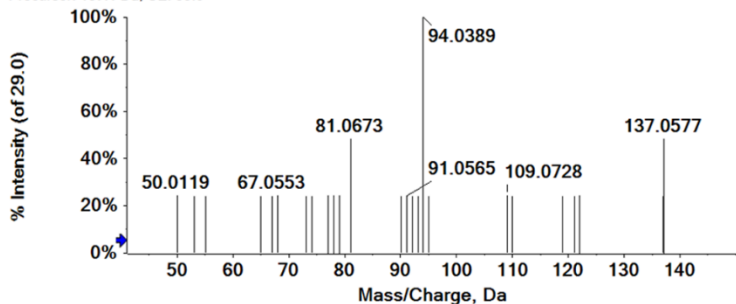

## 3,4,3',5'-Tetrahydroxystilbene 3'-glucoside (34)

Spectrum from IDA-NEG-220228-SM0165.wiff (sample ...xperiment 7, +TOF MS<sup>2</sup> (50 - 1000) from 5.854 min  
Precursor: 405.2 Da

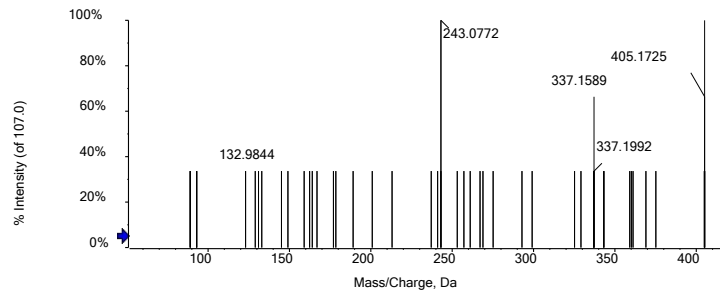

## 6,7-dihydroxycoumarin (esculetin) (35)

Spectrum from IDA-NEG-220228-SM0165.wiff (sample ...xperiment 3, -TOF MS<sup>2</sup> (50 - 1000) from 5.903 min  
Precursor: 177.0 Da

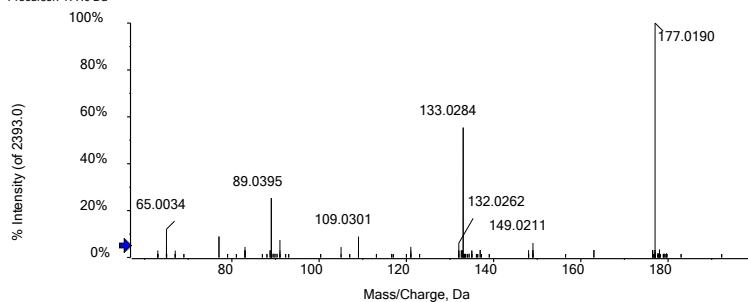

## Quercetin-rhamnose-hexose (36)

Spectrum from IDA-POS-220224-SM0165.wiff (sample ...xperiment 3, +TOF MS<sup>2</sup> (50 - 1000) from 6.424 min  
Precursor: 611.2 Da, CE: 35.0

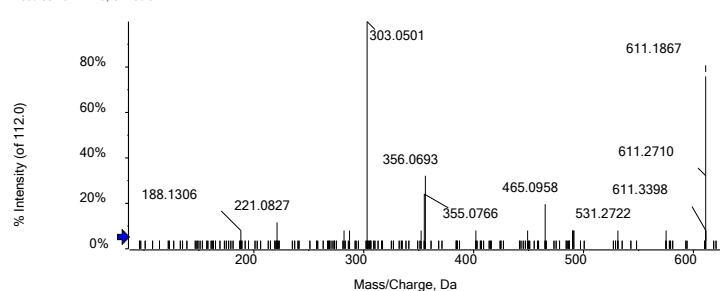

## Formononetin (37)

Spectrum from IDA-NEG-220228-SM0165.wiff (sample ...xperiment 3, -TOF MS<sup>2</sup> (50 - 1000) from 6.625 min  
Precursor: 267.1 Da

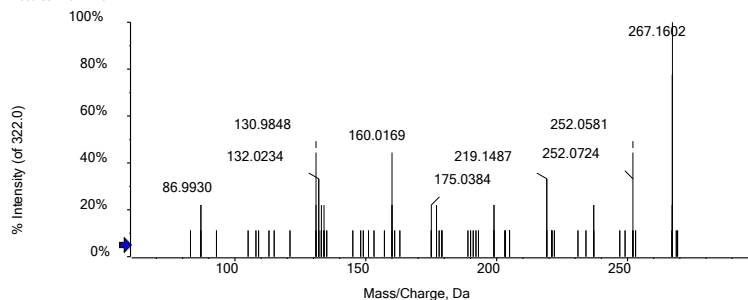

## Danshensu ( $\alpha$ ,3,4-trihydroxy benzenepropanoic acid) (38)

Spectrum from IDA-NEG-220228-SM0165.wiff (sample ...xperiment 2, -TOF MS<sup>2</sup> (50 - 1000) from 6.697 min  
Precursor: 197.0 Da

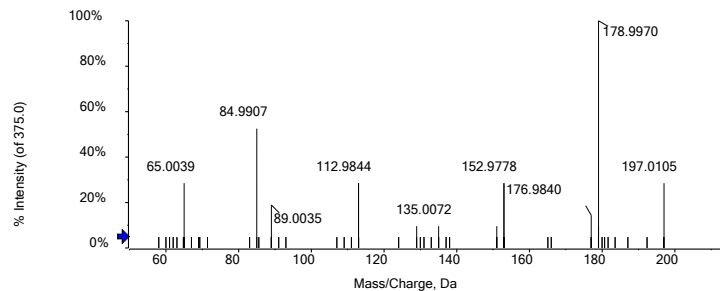

## Kaempferol-7-neohesperidoside (39)

Spectrum from IDA-NEG-220228-SM0165.wiff (sample ...periment 12, -TOF MS<sup>2</sup> (50 - 1000) from 6.816 min  
Precursor: 593.2 Da

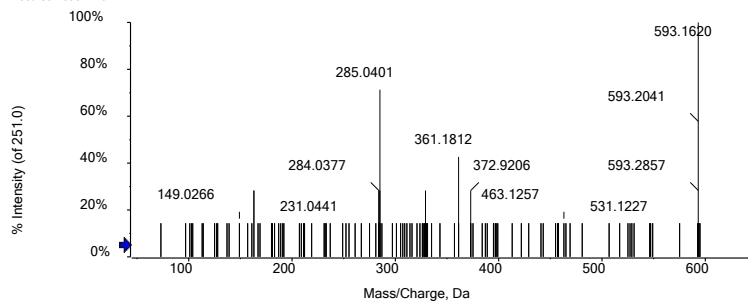

## Quercetin hexoside (40)

Spectrum from IDA-POS-220224-SM0165.wiff (sample ...eriment 13, +TOF MS<sup>2</sup> (50 - 1000) from 6.847 min  
Precursor: 465.2 Da, CE: 35.0

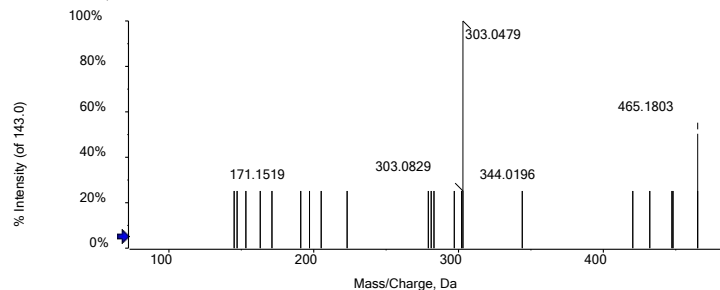

## Okanin-4'-*O*-glucoside [2',3',4',3,4-pen-tahydroxychalcone glucoside] (41)

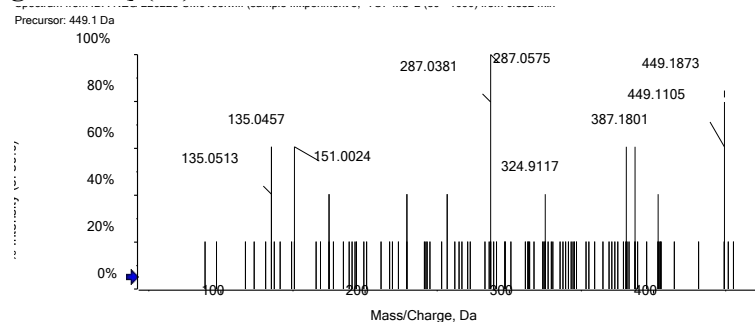

## Isorhamnetin-3-*O*-rutinoside (narcissoside) (42)

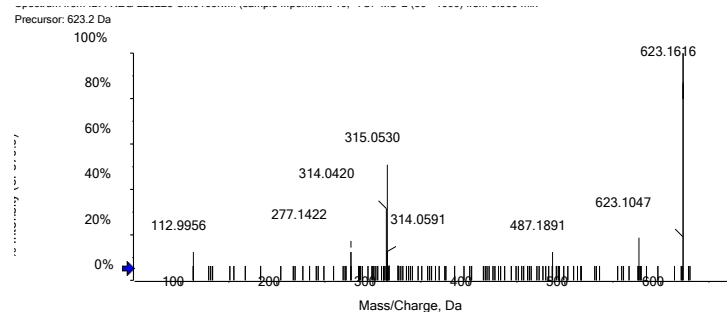

## 6-*O*-*p*-coumaroyl ajugol (43)

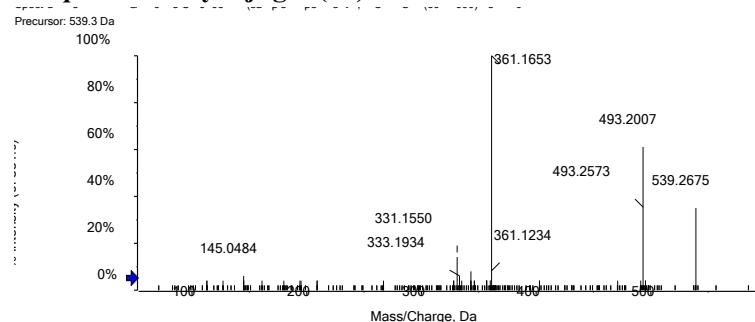

## Agatharesinol (44)

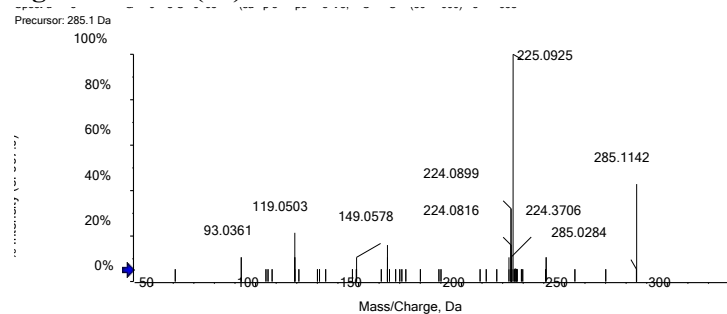

## Isorhamnetin-3-*O*-glucoside (45)

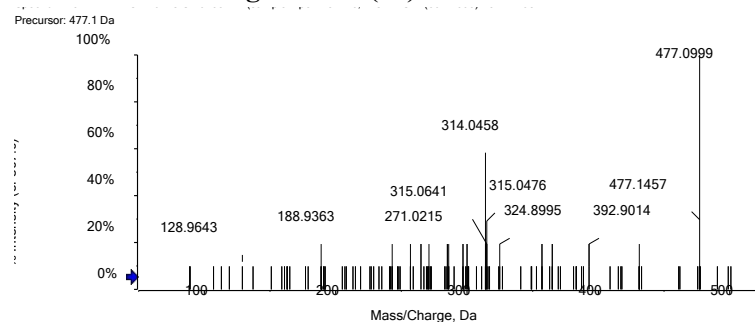

## (epi)catechin (46)

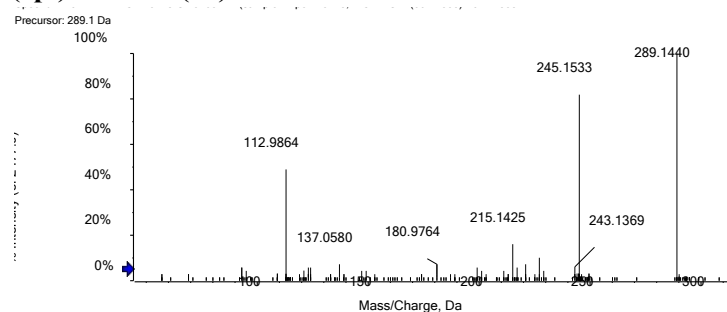

## Kaempferol hexoside (47)

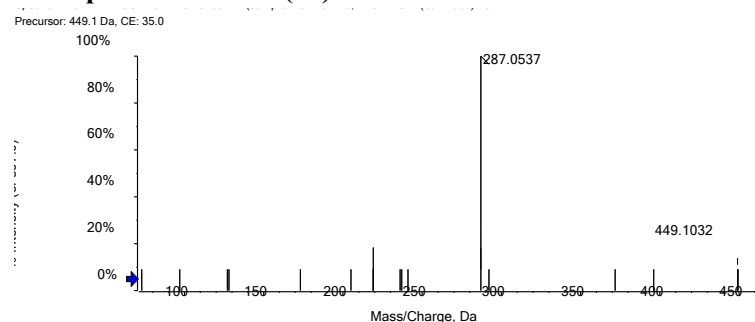

## 3, 5, 7-trihydroxy-4'-methoxyflavone (Diosmetin) (48)

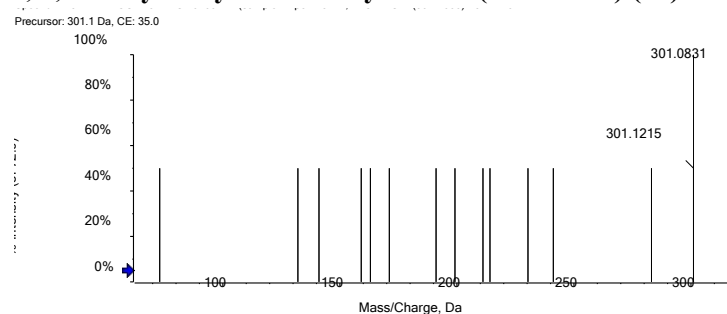

### Apigenin-*O*-hexoside (49)

Precursor: 433.1 Da, CE: 35.0

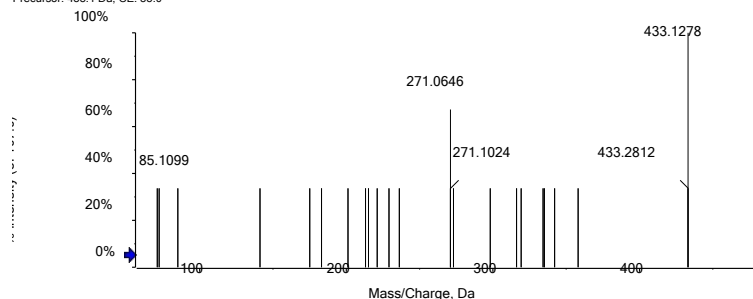

### Phlorizin (50)

Precursor: 435.1 Da

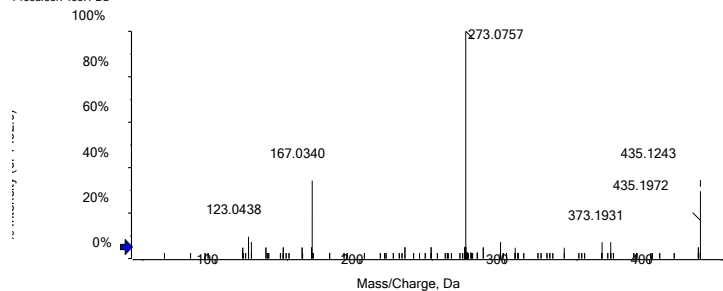

### Syringetin-3-*O*-glucoside (51)

Precursor: 509.1 Da, CE: 35.0

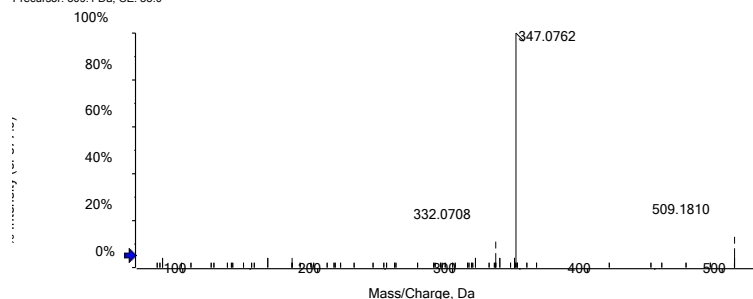

### 7-Hydroxy-8-methoxydihydro-rutaecarpine (7-Hydroxy-8-methoxy,7,8-Dehydro-rutaecarpine) (52)

Precursor: 331.2 Da, CE: 35.0

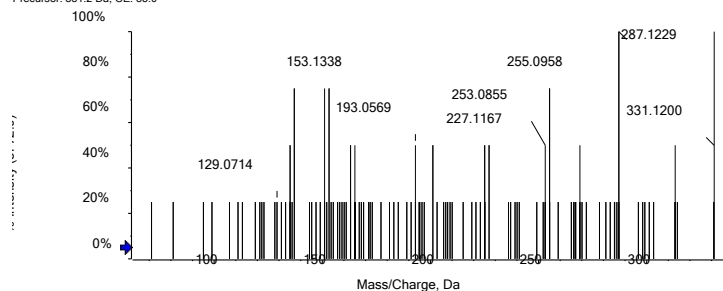

### Myricetin (53)

Precursor: 317.0 Da

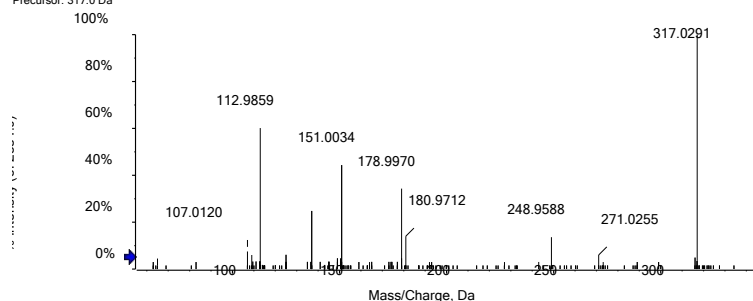

### Umbelliferone (54)

Precursor: 163.1 Da, CE: 35.0

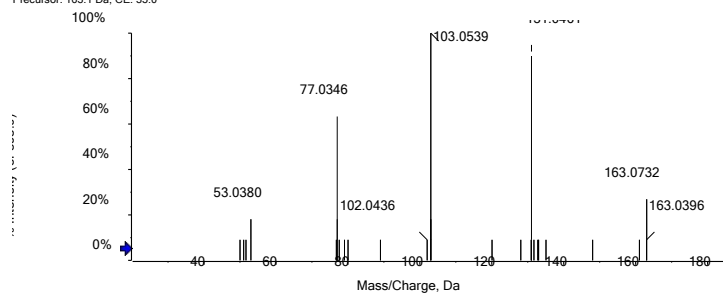

### Hymecromone (4-methylumbellifer-one) (55)

Spectrum from IDA-POS-220224-SM0165.wiff (sample ...xperiment 3, +TOF MS<sup>2</sup> (50 - 1000) from 8.274 min  
Precursor: 177.1 Da, CE: 35.0

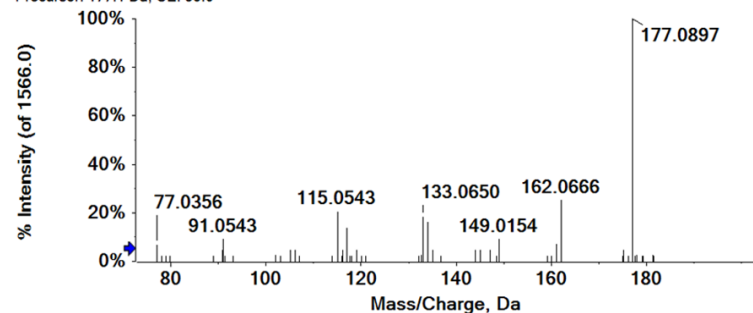

### luteolin 7-*O*-rhamnoside (56)

Spectrum from IDA-NEG-220228-SM0165.wiff (sample ...xperiment 2, -TOF MS<sup>2</sup> (50 - 1000) from 8.296 min  
Precursor: 431.1 Da

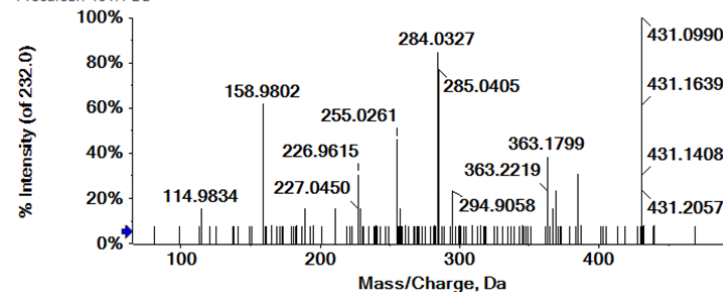

## Steviol (57)

Precursor: 319.0 Da, CE: 35.0

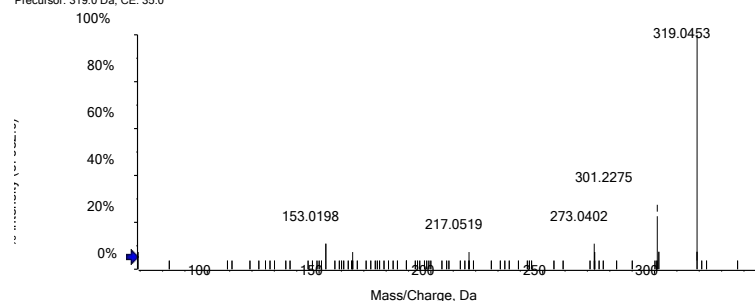

## 16-Hydroxy-8(17),13-labdadien-15,16-olid-19-oic acid (58)

Precursor: 347.2 Da

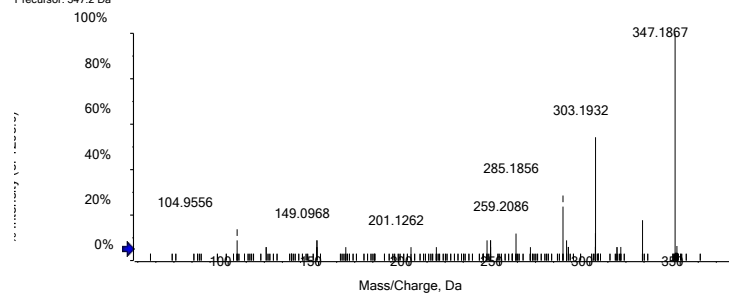

## Angelol A (59)

Precursor: 377.2 Da, CE: 35.0

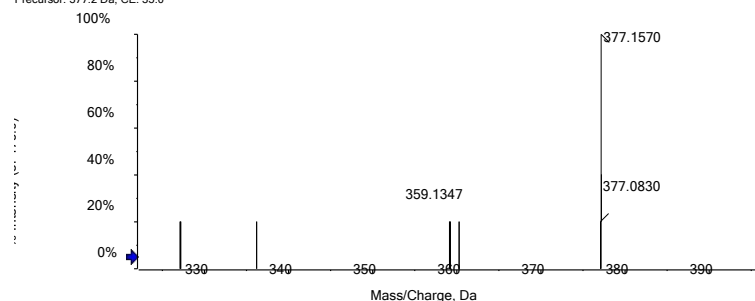

## 6-O-p-coumaroyl dihydroajugol (60)

Precursor: 541.2 Da

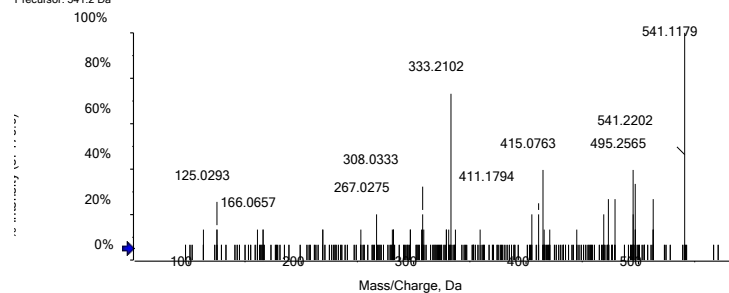

## Copalic acid (61)

Precursor: 303.1 Da

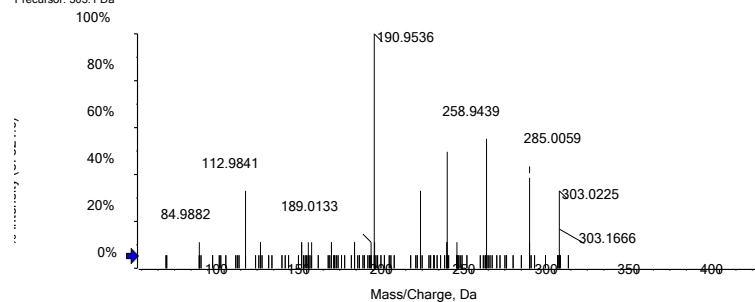

## Abietic acid (62)

Precursor: 303.1 Da, CE: 35.0

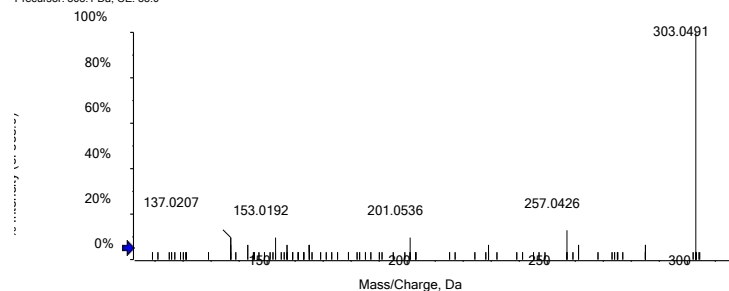

## Retinoic acid (63)

Precursor: 301.2 Da, CE: 35.0

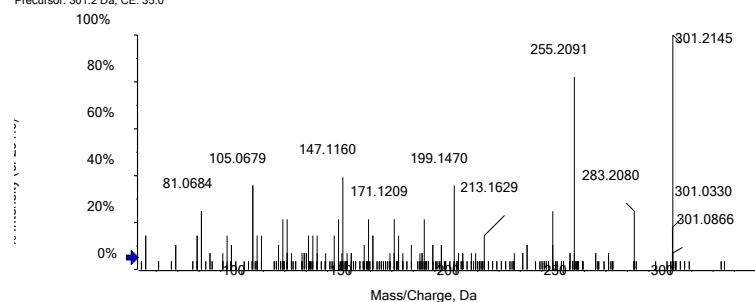

## Dehydroabietic acid (64)

Precursor: 301.2 Da, CE: 35.0

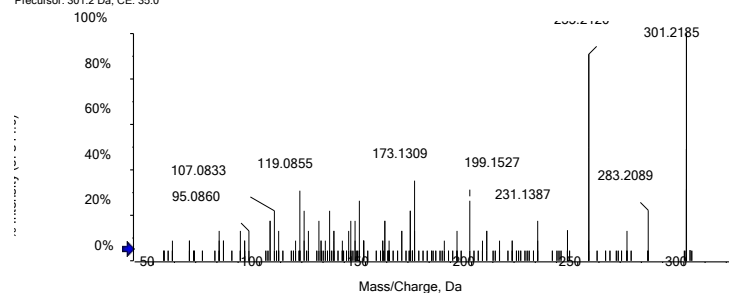



### Taxifolin (dihydroquercetin) (65)

Precursor: 305.2 Da, CE: 35.0

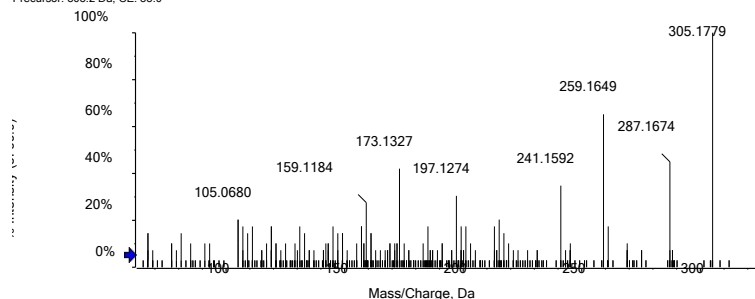

### Luteolin (66)

Precursor: 287.1 Da, CE: 35.0

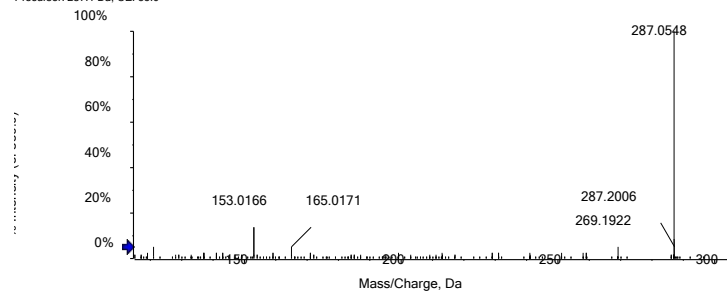

### 15-Hydroypinusolidic acid (67)

Precursor: 347.2 Da

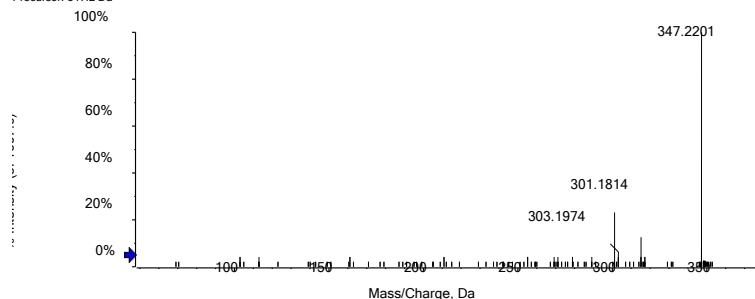

### Isoangelol (68)

Precursor: 377.1 Da, CE: 35.0

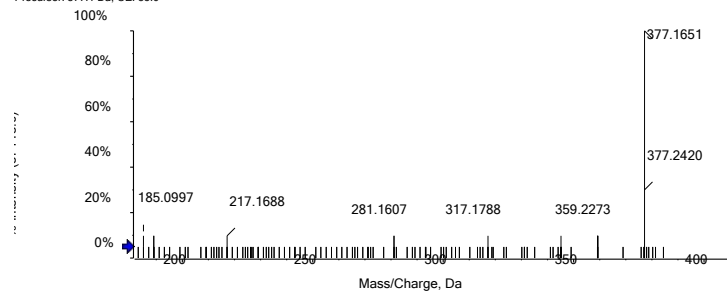

### (epi)gallocatechin-(epi)gallocatechin-(epi)catechin (69)

Precursor: 897.1 Da

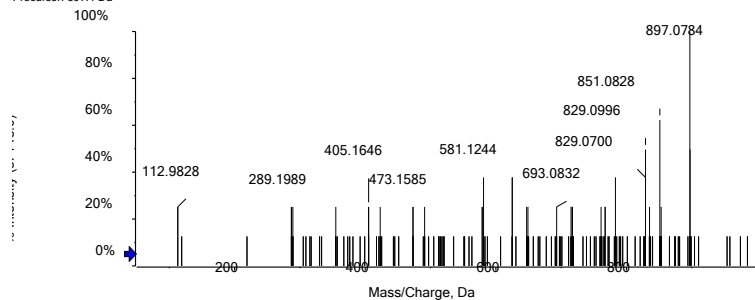

### (epi)catechin-(epi)catechin (70)

Precursor: 577.1 Da

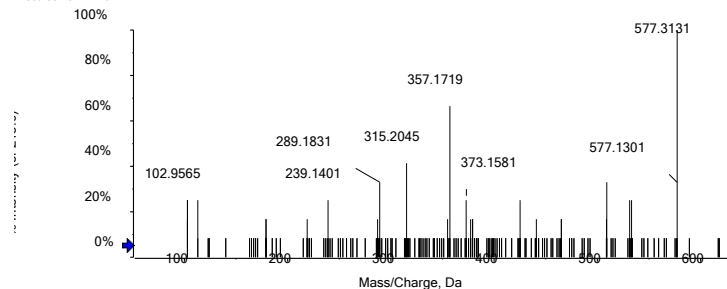

### 3-hydroxy-(13S)-16-nor-pimar-7-en-15-oic acid\* (71)

Precursor: 305.2 Da

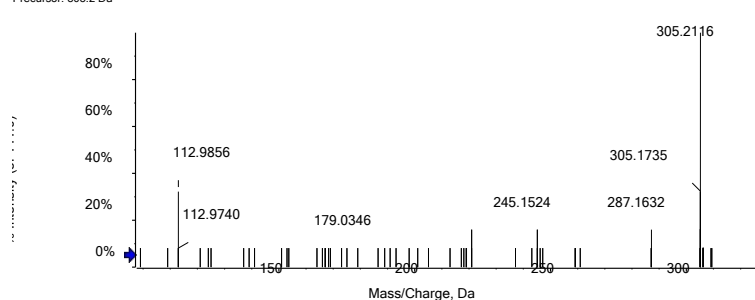

### 15-hydroxy-7-oxo-dehydroabietic acid (72)

Precursor: 331.2 Da, CE: 35.0

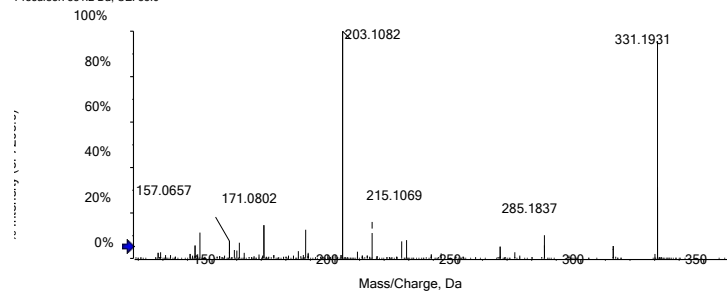

## Carnosol (73)

Precursor: 329.2 Da

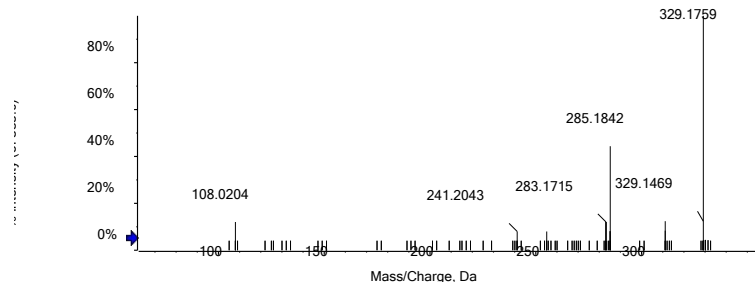

## Quercetin (74)

Precursor: 301.0 Da

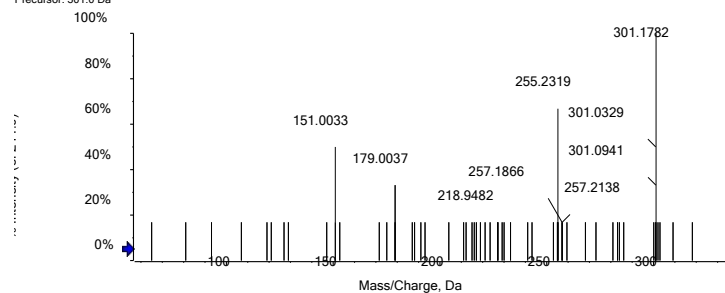

## Isoginkgetin (75)

Precursor: 565.1 Da

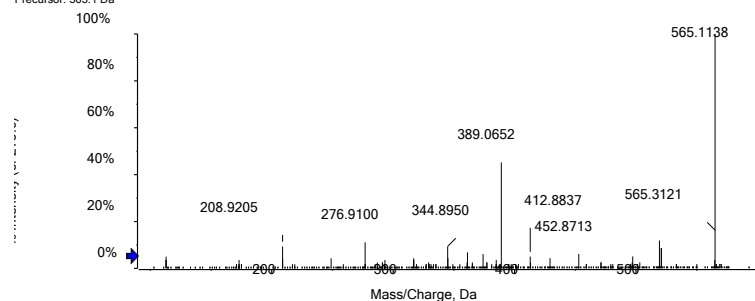

## 7-oxo-dehydroabietic acid (76)

Precursor: 315.2 Da, CE: 35.0

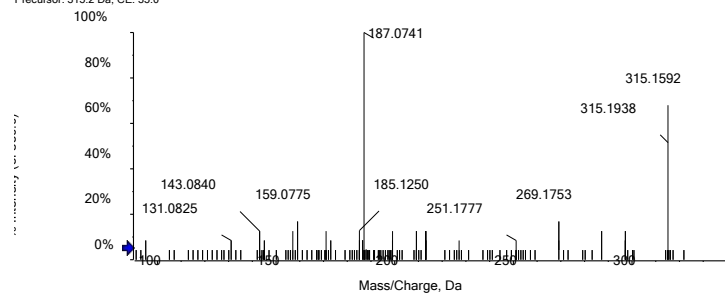

## Chrysin-6-methyl-ether (77)

Precursor: 283.1 Da

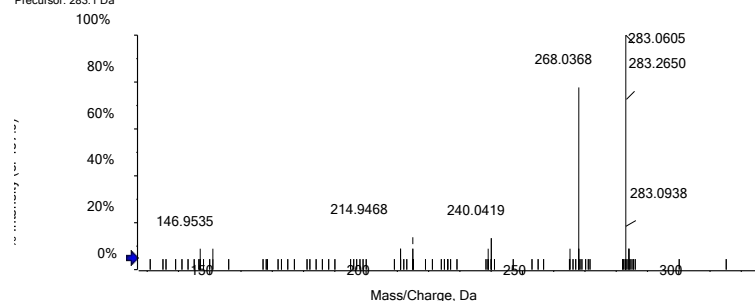

## Physcion (78)

Precursor: 283.1 Da

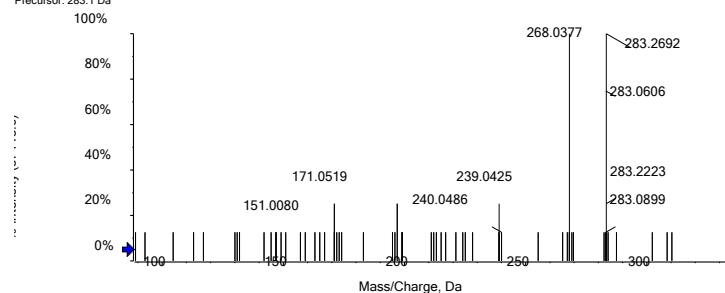

## Pinusolidic acid\* (79)

Precursor: 331.2 Da

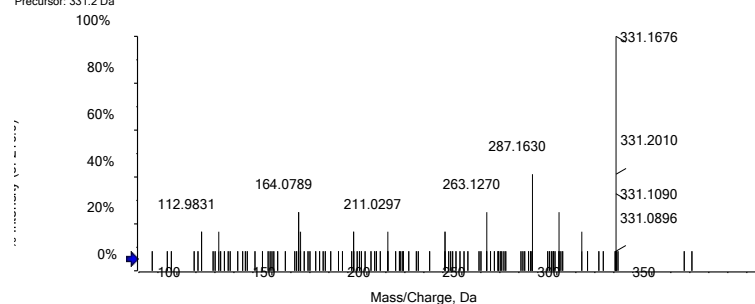

## Hydroxypalmitic Acid (80)

Precursor: 271.2 Da

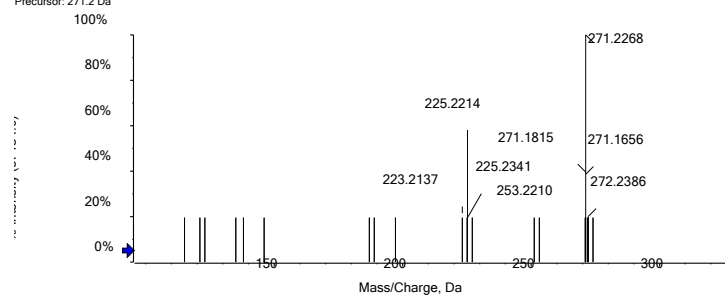

## 4'-Hydroxywogonin (81)

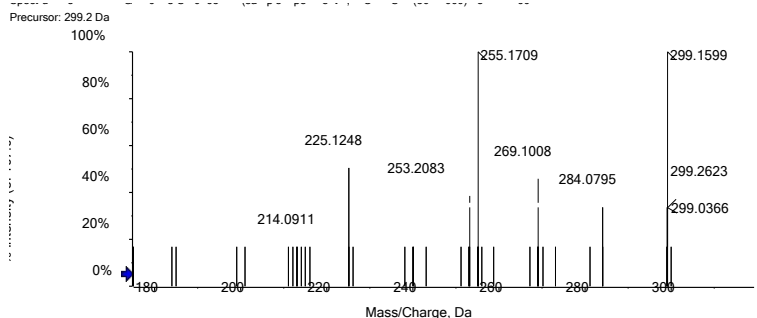

## 2'',3''-Dihydro-3',3'''-biapigenin (82)

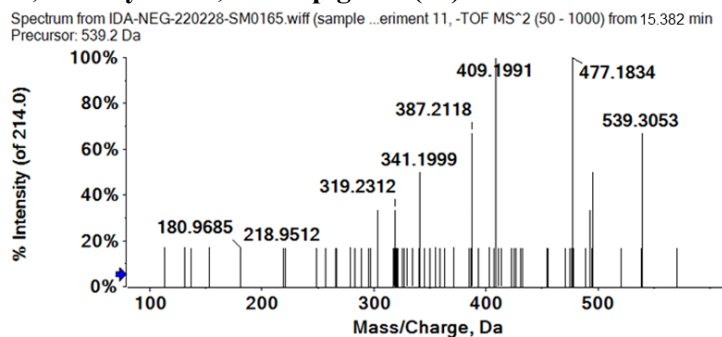

## 2',8''-Biapigenin (83)

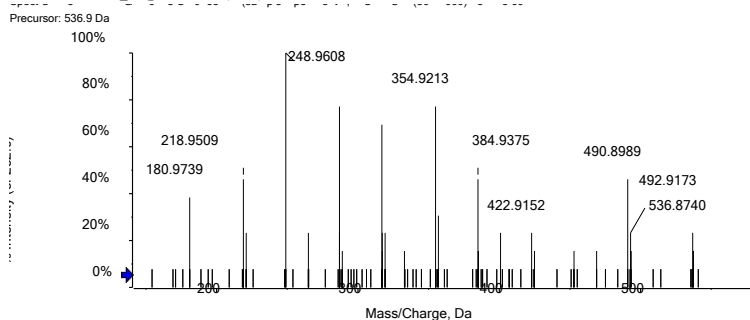

## Robustaflavone 7,4'-dimethyl ether (84)

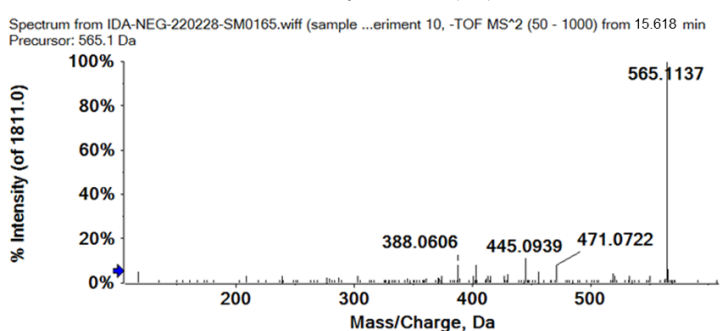

## Delicaflavone (85)

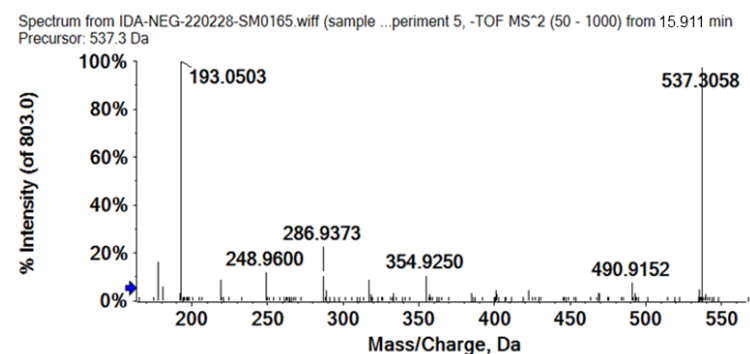

## Abietic acid isomer (86)

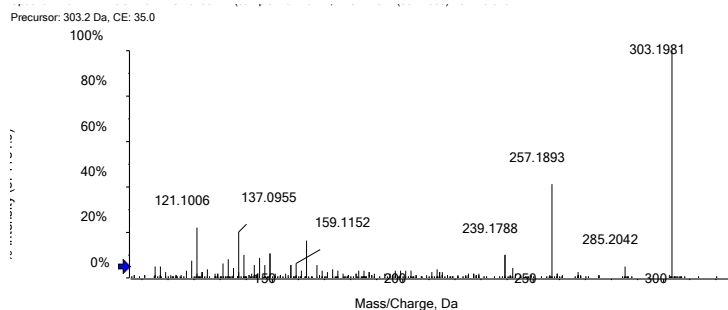

## Dehydroabietic acid isomer (87)

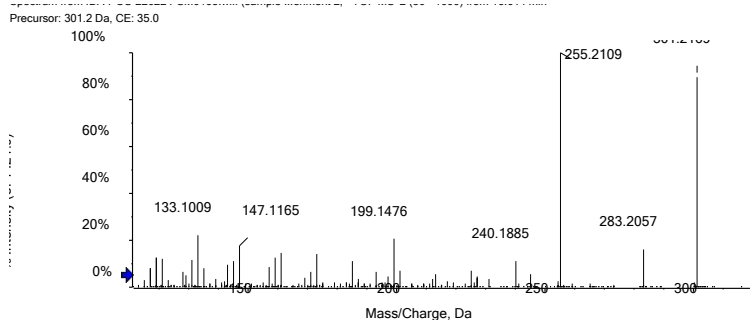

## Dehydrated 15-hydroxy-7-oxo-dehy-droabietic acid (88)

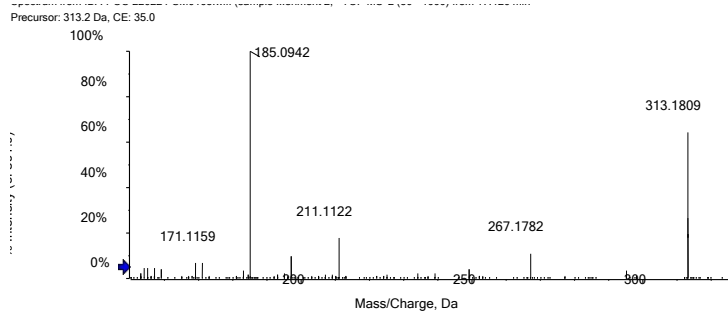

## Agarotetrol formate adduct (89)

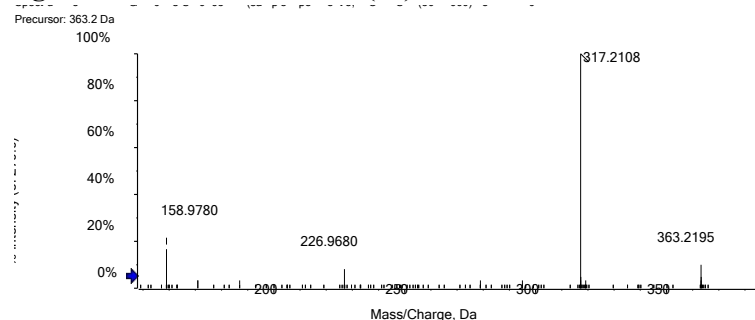

## 7-oxo-dehydroabietic acid isomer (90)

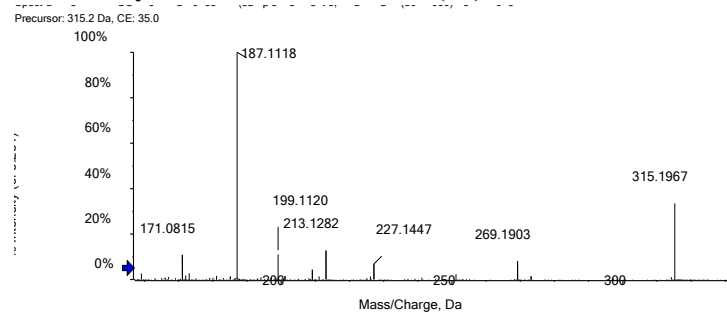

## Abietic acid isomer (91)

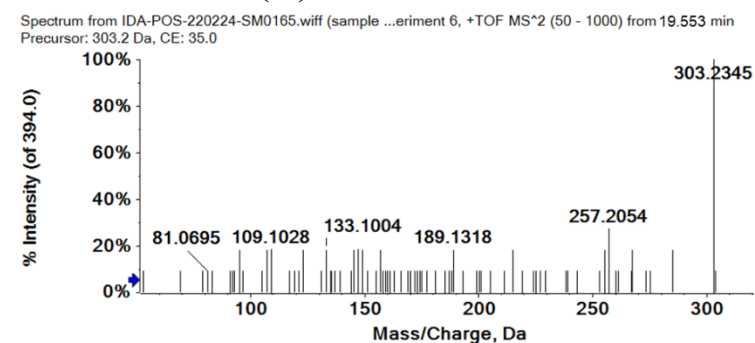

## Dehydroabietic acid isomer (92)

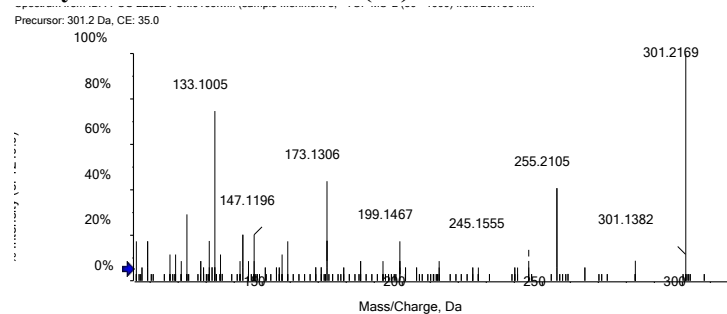

## Dehydroabietic acid isomer (93)

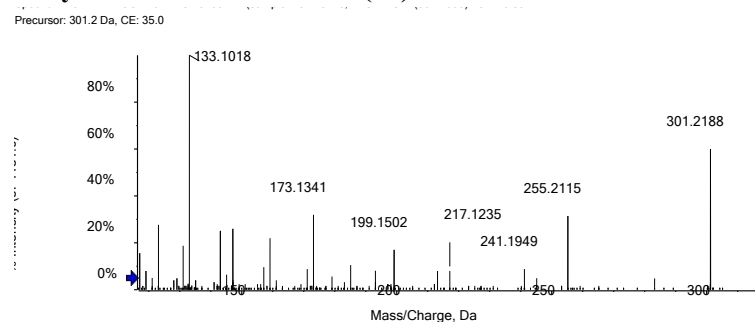

## Dehydroabietic acid isomer (94)

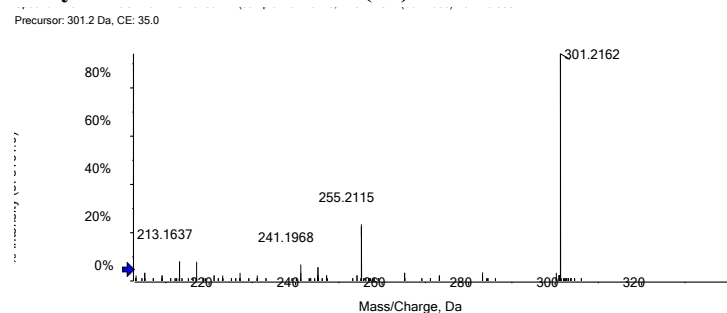

## 7-oxo-dehydroabietic acid isomer (95)

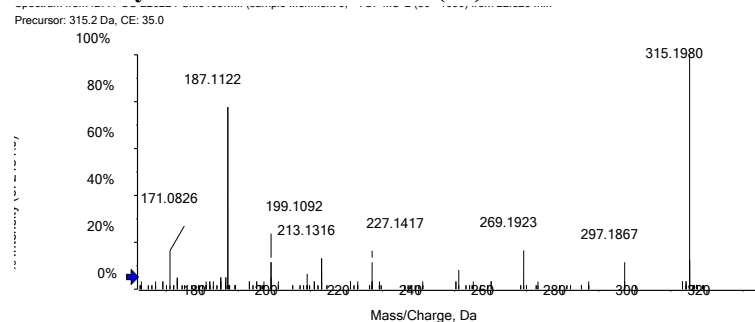

Supplement: s1 [file s1]
