# Supplementary material for: Agathis robusta Bark Extract Protects from Renal Ischemia-Reperfusion Injury: Phytochemical, In Silico and In Vivo Studies
Source: MDPI journal article supplement (doi:10.3390/ph15101270), 2022-10-14
Supplement: s1 [file s1]

**Table S10:** The target proteins used for docking of the selected components of *A. robusta* bark extract

| Proteins (PDB)                                                                                               | Resolution | co-crystallized ligand                                         | Structure of the co-crystallized ligand                                             | RMSD   | Energy score (S) (kcal/mol) |
|--------------------------------------------------------------------------------------------------------------|------------|----------------------------------------------------------------|-------------------------------------------------------------------------------------|--------|-----------------------------|
| Structure of HSP90 with small molecule inhibitor bound (2XHX)                                                | 2.80 Å     | 2-Tert-butyl-4-(1,3-dihydro-2H-isoin-2-ylcarbonyl)phenol (T5M) | 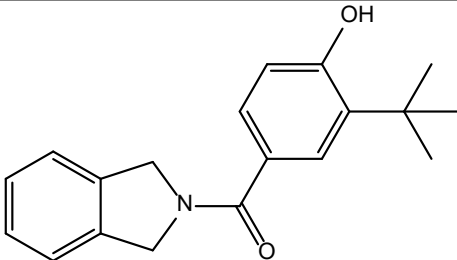 | 1.2702 | - 6.4559                    |
| Growth Factor Epidermal Receptor tyrosine kinase domain with 4-anilinoquinazoline inhibitor erlotinib (1M17) | 2.60 Å     | erlotinib (AQ4)                                                |  | 1.1915 | -8.1587                     |
| An induced fit mechanism regulates p53 DNA binding kinetics to confer sequence specificity (3Q01)            | 2.10 Å     | -                                                              | -                                                                                   | -      | -                           |
