# Supplementary material for: Agathis robusta Bark Extract Protects from Renal Ischemia-Reperfusion Injury: Phytochemical, In Silico and In Vivo Studies
Source: Pharmaceuticals (Basel). 2022 Oct 14;15(10):1270. doi: 10.3390/ph15101270 (PMC9610891; doi:10.3390/ph15101270)
Supplement: Supplementary file 1 [file pharmaceuticals-15-01270-s001.zip]

Archive with 12 entries (12 files):
- Figure S1.pdf
- Table S1.xlsx
- Table S10.xlsx
- Table S11.pdf
- Table S2.xlsx
- Table S3.xlsx
- Table S4.xlsx
- Table S5.xlsx
- Table S6.xlsx
- Table S7.xlsx
- Table S8.xlsx
- Table S9.xlsx
