# Supplementary material for: Agathis robusta Bark Extract Protects from Renal Ischemia-Reperfusion Injury: Phytochemical, In Silico and In Vivo Studies
Source: Pharmaceuticals (Basel). 2022 Oct 14;15(10):1270. doi: 10.3390/ph15101270 (PMC9610891; doi:10.3390/ph15101270)
Supplement: Supplementary file 1 [file pharmaceuticals-15-01270-s001.zip › Table S1.xlsx]

## Sheet: Sheet1
Name	Peak Area %
7-oxo-dehydroabietic acid	29.9512
Caffeic acid	17.1007
15-hydroxy-7-oxo-dehydroabietic acid	11.4593
Dehydroabietic acid	4.89409
Dehydroabietic acid isomer	4.89409
(epi)gallocatechin	4.01436
Quercetin	3.36597
Dehydroabietic acid isomer	2.37096
15-Hydroxypinusolidic acid	1.91889
Trihydroxy benzoic acid (gallic acid)	1.88093
16-Hydroxy-8(17),13-labdadien-15,16-olid-19-oic acid	1.83165
(epi)catechin	1.67599
Dehydroabietic acid isomer	1.22397
N-methyl alanine	1.07108
Choline	1.07107
Dehydrated 15-hydroxy-7-oxo-dehydroabietic acid	0.888254
Pinusolidic acid	0.843347
Robustaflavone 7,4'-dimethyl ether	0.73864
Myricetin	0.698141
7-oxo-dehydroabietic acid isomer	0.678246
7-oxo-dehydroabietic acid isomer	0.637681
Phlorizin	0.522104
6-O-p-coumaroyl ajugol	0.444013
Isorhamnetin-3-O-glucoside*	0.300046
Agatharesinol	0.274332
Hymecromone (4-methylumbelliferone)	0.260841
6,7-dihydroxycoumarin (esculetin)	0.254964
Shikimic acid	0.236125
Luteolin	0.222119
Carnosol	0.206095
Ferulic acid	0.188534
N,N,N-trimethyl-l-alanyl-l-proline betaine	0.179752
[(epi)gallocatechin-(epi)gallocatechin]	0.172083
Umbelliferone	0.169392
3, 5, 7-trihydroxy-4'-methoxyflavone (Diosmetin)	0.16765
Dehydroabietic acid isomer	0.165821
Hydroxycaffeic acid	0.165571
2'',3''-Dihydro-3',3'''-biapigenin	0.152253
Delicaflavone	0.149737
[(epi)catechin-(epi)gallocatechin]	0.139842
[(epi)catechin-(epi)gallocatechin]	0.138679
[(epi)catechin-(epi)gallocatechin]	0.138604
Taxifolin (dihydroquercetin)	0.135382
1,2-Benzenediol	0.116976
Syringetin-3-O-glucoside	0.115418
luteolin 7-O-rhamnoside	0.112784
6-Hydroxycoumarin	0.107732
Isorhamnetin-3-O-rutinoside (narcissoside)	0.0920431
Protocatechuic acid 4- glucoside	0.0899755
3 -hydroxy-(13S)-l6-nor-pimar-7-en-l5-oic acid	0.0799248
Hydroxypalmitic Acid	0.0743453
Steviol	0.0716555
Isoginkgetin	0.069844
β,3,4-Trihydroxy benzenepropanoic acid	0.063136
Isorhamnetin-O-glucoside	0.0598909
4- Aminophenol	0.0597662
Kaempferol-7-neohesperidoside	0.0592885
4'-Hydroxywogonin	0.0578748
Formononetin	0.0523484
Methoxy hydroxy benzoic acid (Vanillic acid)	0.0514745
Danshensu (α,3,4-trihydroxy benzenepropanoic acid)	0.0500876
Copalic acid	0.0492208
Adenine	0.0473971
Okanin-4'-O-glucoside [2',3',4',3,4-pentahydroxychalcone glucoside]	0.0393882
Kaempferol hexoside	0.0386272
isoangelol	0.038
(epi)gallocatechin-(epi)gallocatechin-(epi)catechin	0.0357373
Succinic acid	0.0357147
3,4,3',5'-Tetrahydroxystilbene 3'-glucoside	0.0352079
[(epi)gallocatechin-(epi)gallocatechin]	0.0251159
Abietic acid	0.0243118
physcion	0.0241008
Quinic acid	0.0207053
Angelol A	0.0196711
Agarotetrol formate adduct	0.0195338
[(epi)gallocatechin-(epi)gallocatechin]	0.0178875
Dihydrocaffeic acid	0.015715
Sorbitol 6-phosphate	0.0150499
Quercetin-rhamnose-hexose	0.0141783
(epi)catechin-(epi)catechin	0.0134916
Quercetin hexoside	0.0124054
Dihydroxybenzoic acid (protocatechuic acid)	0.011441
Cysteine	0.00865894
Chrysin-6-methyl-ether	0.00791075
6-O-p-coumaroyl dihydroajugol	0.00765645
2',8''-Biapigenin	0.00699643
Glycine- betaine	0.00534882
Hypoxanthine	0.0033913
Salicylic acid	0.00288667
Dihydrosinapic acid	0.0025
Retinoic acid	0.00187848
Abietic acid isomer	0.00149046
7-Hydroxy-8-methoxydedihydrorutaecarpine	0.00129911
Apigenin-O-hexoside	0.00128377
Abietic acid isomer	0.00108776
