# Supplementary material for: Agathis robusta Bark Extract Protects from Renal Ischemia-Reperfusion Injury: Phytochemical, In Silico and In Vivo Studies
Source: Pharmaceuticals (Basel). 2022 Oct 14;15(10):1270. doi: 10.3390/ph15101270 (PMC9610891; doi:10.3390/ph15101270)
Supplement: Supplementary file 1 [file pharmaceuticals-15-01270-s001.zip › Table S3.xlsx]

## Sheet: Targets for all compds
Targets for all compounds (RIRI and others)
ABAT
ABCB1
ABCC1
ABCG2
ABL1
ACACB
ACE
ACE2
ACHE
ACLY
ACP1
ACVRL1
ADA
ADAM17
ADAMTS4
ADAMTS5
ADH1A
ADH5
ADK
ADORA1
ADORA2A
ADORA2B
ADORA3
ADRA1A
ADRA1D
ADRA2A
ADRA2B
ADRA2C
ADRB1
ADRB2
ADRB3
AGTR1
AGTR2
AHCY
AHR
AKR1A1
AKR1B1
AKR1B10
AKR1C1
AKR1C2
AKR1C3
AKR1C4
AKT1
ALB
ALDH2
ALDH5A1
ALK
ALOX12
ALOX15
ALOX15B
ALOX5
ALOX5AP
ALPG
ALPL
AMPD1
AMPD3
AMY1A
ANPEP
AOC3
APEX1
APP
AR
ARG1
ASNS
ATIC
ATP12A
ATP4B ATP4A
AURKA
AURKB
AVPR2
AXL
BACE1
BAD
BCAT2
BCHE
BCL2
BCL2A1
BCL2L1
BCL2L2
BMP1
BRAF
BRD4
BRS3
BTK
CA1
CA12
CA13
CA14
CA2
CA3
CA4
CA5A
CA5B
CA6
CA7
CA9
CAMK2B
CAMKK2
CASP1
CASP2
CASP3
CASP6
CASP7
CASP8
CBR1
CCKBR
CCNB3 CDK1 CCNB1 CCNB2
CCND1 CDK4
CCNE1 CDK2
CCR1
CCR3
CCR9
CD22
CD38
CD81
CDA
CDC25A
CDC25B
CDC25C
CDC42
CDC45
CDC7
CDK1
CDK1 CCNB1
CDK2
CDK2 CCNA1 CCNA2
CDK5
CDK5R1 CDK5
CDK6
CDK9 CCNT1
CES1
CES2
CETP
CFTR
CHEK1
CHEK2
CHIA
CHRM1
CHRM2
CHRNA3 CHRNB4
CHRNA7
CISD1
CLK1
CMA1
CNOT7
CNR1
CNR2
COMT
CPA1
CPA3
CPB1
CPT1A
CPT1B
CPT2
CREBBP
CRHR1
CSF1R
CSNK1A1
CSNK1D
CSNK2A1
CTBP2
CTNNB1
CTSA
CTSD
CTSG
CXCL8
CXCR1
CXCR2
CYP17A1
CYP19A1
CYP1A1
CYP1A2
CYP1B1
CYP26A1
CYP26B1
CYP2C19
CYP2C9
CYP3A4
CYP51A1
CYSLTR1
DAGLA
DAGLB
DAO
DAPK1
DBF4 CDC7
DCTPP1
DGAT1
DHFR
DHODH
DNM1
DNM2
DNMT1
DPP4
DPP7
DPP8
DRD1
DRD2
DRD3
DRD4
DRD5
DTYMK
DUSP3
DYRK1A
DYRK1B
ECE1
EDNRA
EDNRB
EGFR
EGLN1
EHMT2
EIF2AK3
EIF4A1
EIF4E
EIF4H
ELANE
ENGASE
ENPEP
ENPP2
EP300
EPHA2
EPHB4
EPHX2
ERAP2
ERBB2
ERN1
ESR1
ESR2
ESRRA
ESRRB
F10
F2
F2R
F3
F7
F9
FAAH
FABP1
FABP2
FABP3
FABP4
FABP5
FADS1
FASN
FBP1
FCER2
FDFT1
FDPS
FEN1
FFAR1
FFAR4
FGF1
FGFR1
FGR
FHIT
FLT1
FLT3
FLT4
FNTA FNTB
FOLH1
FPGS
FTO
FUCA1
FUT4
FUT7
FYN
G6PD
GAA
GABBR1
GABRA1
GABRA1 GABRB2
GABRA1 GABRB2 GABRG2
GABRA2 GABRB2 GABRG2
GABRA2 GABRB3 GABRG2
GABRA5
GABRB3 GABRA3 GABRG2
GABRB3 GABRG2 GABRA1
GABRB3 GABRG2 GABRA5
GAPDH
GART
GBA
GCGR
GCLC
GGPS1
GLO1
GLUL
GNPAT
GPBAR1
GPER1
GPR35
GPR55
GPR84
GRIA1
GRIA2
GRIA4
GRIK1
GRIK2
GRIK3
GRIK5
GRIN1 GRIN2B
GRK1
GRK2
GRK3
GRK4
GRK5
GRK6
GRK7
GRM2
GRM3
GRM6
GSK3A
GSK3B
GSR
GSTK1
GYS1
HAO1
HARS
HCAR2
HDAC1
HDAC10
HDAC2
HDAC4
HDAC5
HDAC6
HDAC7
HDAC8
HDAC9
HIF1A
HK1
HK2
HLCS
HMGCR
HNF4A
HPRT1
HPSE
HRAS
HRH1
HRH2
HRH4
HSD11B1
HSD11B2
HSD17B1
HSD17B2
HSD17B3
HSP90AA1
HSP90AB1
HSPA1A
HSPA5
HSPA8
HTR1A
HTR2A
HTR2C
HTR3A
HTR6
IARS
IDO1
IGF1R
IGFBP3
IKBKB
IKBKG IKBKB CHUK
IL2
IL6
ILK
IMPDH1
IMPDH2
INSR
IRAK4
ITGA2B ITGB3
ITGA4
ITGAL
ITGAL ICAM1 ITGB2
ITGAV
ITGAV ITGB3
ITGAV ITGB6
ITGB1 ITGA2
ITGB1 ITGA4
ITGB1 ITGA5
ITGB7 ITGA4
JAK1
JAK2
JAK3
JUN
KCNA3
KCNA5
KCNH2
KCNMA1
KDM2A
KDM2B
KDM3A
KDM4A
KDM4C
KDM4D
KDM4E
KDM5A
KDM5B
KDM5C
KDM6B
KDM7A
KDR
KEAP1
KIF11
KISS1R
KIT
KLK1
KLK2
KLK3
KMO
LAP3
LCK
LDHA
LDHB
LGALS3
LGALS4
LGALS8
LGALS9
LIMK2
LRRK2
LTA4H
LTB4R
LYN
MAOA
MAOB
MAP2
MAP2K1
MAP2K2
MAP2K7
MAP3K14
MAP3K7
MAP3K8
MAP3K9
MAPK1
MAPK10
MAPK3
MAPK8
MAPKAPK5
MAPT
MARS
MB
MC4R
MCL1
MDM2
MET
METAP2
MGAM
MGLL
MGMT
MIF
MKNK2
MME
MMEL1
MMP1
MMP12
MMP13
MMP14
MMP16
MMP2
MMP3
MMP7
MMP9
MPG
MPO
MTNR1A
MTNR1B
MVD
MYLK
NAALAD2
NAE1
NAT1
NCOR2 HDAC3
NEK2
NEK6
NEU2
NEU3
NEU4
NFE2L2
NFKB1
NGFR
NISCH
NMUR2
NOS1
NOS2
NOS3
NOX4
NPC1L1
NPY5R
NQO1
NQO2
NR1H2
NR1H4
NR1I3
NR3C1
NR3C2
NTRK1
NTSR1
NUAK1
NUDT1
ODC1
OGA
OPRD1
OPRK1
OPRM1
OTC
OXER1
P2RX1
P2RX3
P2RY1
P2RY11
P2RY6
PABPC1
PAK1
PANK3
PARP1
PDCD4
PDE10A
PDE3A
PDE4A
PDE4B
PDE4C
PDE4D
PDE5A
PDE7A
PDGFRA
PDGFRB
PDPK1
PFKFB3
PFKFB4
PGD
PGF
PGR
PHF8
PIK3CA
PIK3CA PIK3R1
PIK3CB
PIK3CD
PIK3CD PIK3R1
PIK3CG
PIK3R1
PIM1
PIN1
PKN1
PLA2G10
PLA2G1B
PLA2G2A
PLA2G4A
PLA2G4B
PLA2G5
PLA2G7
PLAA
PLAT
PLAU
PLEC
PLG
PLK1
PLK4
PNMT
PNP
POLA1
POLB
POLD1
POLG
PON1
PPARA
PPARD
PPARG
PPP2CA
PPP5C
PREP
PRKACA
PRKAG1 PRKAB1 PRKAA2
PRKCA
PRKCB
PRKCD
PRKCE
PRKCG
PRKCH
PRKCI
PRKCQ
PRKCZ
PRKDC
PRSS1
PSEN2 PSENEN NCSTN APH1A PSEN1 APH1B
PSMB5
PTGDR
PTGDR2
PTGER1
PTGER2
PTGER3
PTGER4
PTGES
PTGES2
PTGFR
PTGIR
PTGS1
PTGS2
PTK2
PTK2B
PTPN1
PTPN11
PTPN2
PTPN22
PTPN6
PTPN9
PTPRC
PTPRF
PTPRG
PTPRS
PYGL
PYGM
QARS
QDPR
QPCT
QPCTL
RAC1
RAF1
RARA
RARB
RARG
RARS
RBP4
RELA
REN
RET
RIPK2
RNASEH1
RNPEP
ROCK1
ROCK2
RORA
RORC
RPA1
RPS6KA3
RPS6KA5
RXRA
RXRB
RXRG
S1PR1
S1PR2
S1PR3
S1PR5
SCD
SCN2A
SCN5A
SCN9A
SELE
SELL
SELP
SERPINA6
SERPINE1
SGK1
SHBG
SHH
SIGMAR1
SIRT2
SLC10A2
SLC13A5
SLC16A1
SLC1A1
SLC1A2
SLC1A3
SLC22A12
SLC22A6
SLC28A2
SLC28A3
SLC29A1
SLC5A1
SLC5A2
SLC5A4
SLC6A1
SLC6A2
SLC6A3
SLC6A4
SLC7A5
SNCA
SOAT1
SQLE
SRC
SRD5A1
SRD5A2
SREBF2
SSTR1
SSTR2
SSTR3
SSTR4
SSTR5
ST3GAL3
ST6GAL1
STAT1
STAT3
STS
SUV39H1
SYK
TACR2
TARS
TAS2R31
TBXA2R
TBXAS1
TDO2
TDP1
TDP2
TEK
TERT
TGFBR1
THRA
THRB
THRB THRA
TK1
TKT
TLR4
TLR9
TNF
TNKS
TNKS2
TNNC1 TNNT2 TNNI3
TNNI3K
TOP1
TOP2A
TP53
TPMT
TRPA1
TRPM2
TRPM8
TRPV1
TSPO
TTL
TTR
TUBB1
TUBB3
TYK2
TYMP
TYMS
TYR
UGT2B7
UMPS
UPP1
UQCRB
VCP
VDR
VEGFA
WDR5
WEE1
XDH
YARS
