# Supplementary material for: Agathis robusta Bark Extract Protects from Renal Ischemia-Reperfusion Injury: Phytochemical, In Silico and In Vivo Studies
Source: Pharmaceuticals (Basel). 2022 Oct 14;15(10):1270. doi: 10.3390/ph15101270 (PMC9610891; doi:10.3390/ph15101270)
Supplement: Supplementary file 1 [file pharmaceuticals-15-01270-s001.zip › Table S5.xlsx]

## Sheet: RIRI overlapping targets
Targets
ABAT
ABCB1
ABCG2
ABL1
ACE
ACE2
ACHE
ACP1
ADA
ADAM17
ADAMTS5
ADK
ADORA1
ADORA2A
ADORA2B
ADORA3
ADRB1
ADRB2
AGTR1
AGTR2
AKR1B1
AKT1
ALB
ALDH2
ALDH5A1
ALOX12
ALOX15
ALOX5
AMPD1
AMPD3
AOC3
APEX1
APP
ARG1
AXL
BAD
BCHE
BCL2
BCL2L1
BRD4
BTK
CA1
CA2
CA3
CA9
CAMKK2
CASP1
CASP2
CASP3
CASP6
CASP7
CASP8
CBR1
CD38
CDC42
CDK5
CFTR
CHEK1
CHEK2
CHRM2
CHRNA7
CNR1
CNR2
COMT
CPT1A
CPT1B
CPT2
CSF1R
CSNK2A1
CTNNB1
CTSD
CTSG
CXCL8
CXCR1
CXCR2
CYP1B1
CYP2C19
CYP2C9
CYSLTR1
DAO
DAPK1
DNM2
DPP4
DRD2
ECE1
EDNRA
EDNRB
EGFR
EGLN1
EIF2AK3
EIF4E
ELANE
EPHA2
EPHX2
ERN1
ESR1
F10
F2
F2R
F3
FABP1
FABP2
FABP3
FABP4
FADS1
FASN
FGF1
FLT1
FTO
FYN
G6PD
GAPDH
GCLC
GLO1
GLUL
GPBAR1
GPER1
GRIA1
GRIA4
GRIK1
GRIK2
GRK2
GSK3B
GSR
HDAC1
HDAC6
HIF1A
HK2
HMGCR
HPRT1
HRH1
HRH2
HSD11B2
HSP90AA1
HSP90AB1
HSPA1A
HSPA5
HSPA8
HTR2A
HTR3A
IDO1
IGF1R
IGFBP3
IL2
IL6
INSR
IRAK4
ITGA4
ITGAL
ITGAV
JAK1
JAK2
JUN
KCNA3
KCNA5
KCNH2
KCNMA1
KDM3A
KDR
KEAP1
KIT
KLK1
LAP3
LDHA
LGALS3
LTB4R
MAOA
MAOB
MAP2
MAP2K1
MAP2K7
MAP3K14
MAP3K7
MAPK1
MAPK10
MAPK14
MAPK3
MAPK8
MAPT
MB
MDM2
MGAM
MIF
MME
MMP1
MMP13
MMP14
MMP16
MMP2
MMP8
MMP9
MPO
NFE2L2
NFKB1
NGFR
NOS1
NOS2
NOS3
NOX4
NQO1
NR1H2
NR1H3
NR1I3
NR3C1
NR3C2
NTRK1
ODC1
OGA
OPRD1
OPRK1
OPRM1
P2RY1
P2RY11
PARP1
PDE3A
PDE4A
PDE5A
PDPK1
PIK3CA
PIK3CB
PIK3CD
PIK3CG
PIK3R1
PIM1
PLA2G10
PLA2G1B
PLA2G2A
PLA2G4A
PLA2G7
PLAT
PLAU
PLG
PNP
PON1
PPARA
PPARD
PPARG
PPP2CA
PRKACA
PRKCA
PRKCB
PRKCD
PRKCE
PRKCI
PRKCZ
PRKDC
PTGER1
PTGER2
PTGER3
PTGER4
PTGES
PTGIR
PTGS1
PTGS2
PTK2
PTK2B
PTPN11
PTPN6
PTPRC
RAC1
RAF1
RELA
REN
RIPK2
ROCK1
ROCK2
RPS6KA5
S1PR1
S1PR2
S1PR3
SCN5A
SELE
SELL
SELP
SERPINE1
SGK1
SHH
SI
SIRT2
SLC16A1
SLC1A1
SLC22A6
SLC29A1
SLC5A1
SLC5A2
SLC6A2
SLC6A3
SLC6A4
SNCA
SOAT1
SRC
STAT1
STAT3
TBXA2R
TBXAS1
TEK
TERT
TGFBR1
THRA
TKT
TLR4
TNF
TP53
TRPA1
TRPM2
TRPV1
TSPO
TYK2
TYR
VCP
VEGFA
XDH
